# Supplementary material for: Direct-Acting Antivirals for HCV Treatment in Decompensated Liver Cirrhosis Patients: A Systematic Review and Meta-Analysis
Source: MDPI journal article supplement (doi:10.3390/jpm12091517), 2022-09-15
Supplement: s1 [file s1]

# Supplementary Material

## Direct-acting antivirals for HCV treatment in decompensated liver cirrhosis patients: A systematic review and meta-analysis

### Table of Contents

#### I. Supplementary Materials and Methods.....2

Search strategy

#### II. Supplementary Tables and Figures.....6

Supplementary figures

Risk of bias

Publication bias

#### I. Search strategy

##### 1-1. Ovid MEDLINE(R)

| No. | Search terms                                                                                                                                                                                                                                                                                      |
|-----|---------------------------------------------------------------------------------------------------------------------------------------------------------------------------------------------------------------------------------------------------------------------------------------------------|
| 1   | exp Hepatitis C, Chronic/                                                                                                                                                                                                                                                                         |
| 2   | chronic adj5 (hepatitis C or hepacivirus* or hcv).mp.                                                                                                                                                                                                                                             |
| 3   | 1 OR 2                                                                                                                                                                                                                                                                                            |
| 4   | exp Antiviral agents/                                                                                                                                                                                                                                                                             |
| 5   | exp Protease Inhibitors/                                                                                                                                                                                                                                                                          |
| 6   | exp Nucleic acid synthesis inhibitors/                                                                                                                                                                                                                                                            |
| 7   | (direct* acting anti?viral*) or DAA or ((protease or polymerase) adj3 inhibitor*).mp.                                                                                                                                                                                                             |
| 8   | (ledipasvir OR sofosbuvir OR elbasvir OR grazoprevir OR velpatasvir OR voxilaprevir OR glecaprevir OR pibrentasvir OR ombitasvir OR paritaprevir OR ritonavir OR dasabuvir OR simeprevir OR boceprevir OR telaprevir OR asunaprevir OR daclatasvir OR Harvoni OR Zepatier OR Epclusa OR Vosevi OR |

|    |                                                                                                                                                                                                                                                                                                                                                                                                                                                                                                                                                                                                                                                                                                                   |
|----|-------------------------------------------------------------------------------------------------------------------------------------------------------------------------------------------------------------------------------------------------------------------------------------------------------------------------------------------------------------------------------------------------------------------------------------------------------------------------------------------------------------------------------------------------------------------------------------------------------------------------------------------------------------------------------------------------------------------|
|    | Mavyret OR Maviret OR 'Holkira Pak' OR 'Viekira Pak' OR Viekirax OR Exviera OR Technivie OR Galexos OR Sovaldi OR Victrelis OR Incivek OR Incivo OR Olysio OR Sunvepra OR Daklinza).mp.                                                                                                                                                                                                                                                                                                                                                                                                                                                                                                                           |
| 9  | 4 or 5 or 6 or 7 or 8                                                                                                                                                                                                                                                                                                                                                                                                                                                                                                                                                                                                                                                                                             |
| 10 | 3 and 9                                                                                                                                                                                                                                                                                                                                                                                                                                                                                                                                                                                                                                                                                                           |
| 11 | (Randomized Controlled Trials as Topic/ or randomized controlled trial/ or Random Allocation/ or Double Blind Method/ or Single Blind Method/ or clinical trial/ or clinical trial, phase i.pt. or clinical trial, phase ii.pt. or clinical trial, phase iii.pt. or clinical trial, phase iv.pt. or controlled clinical trial.pt. or randomized controlled trial.pt. or multicenter study.pt. or clinical trial.pt. or exp Clinical Trials as topic/ or (clinical adj trial\$).tw. or ((singl\$ or doubl\$ or treb\$ or tripl\$) adj (blind\$3 or mask\$3)).tw. or PLACEBOS/ or placebo\$.tw. or randomly allocated.tw. or (allocated adj2 random\$).tw.) not (case report.tw. or letter/ or historical article/) |
| 12 | Epidemiologic Studies/ or exp Case Control Studies/ or exp Cohort Studies/ or Case-control.tw. or (cohort adj (study or studies)).tw. or Cohort analy\$.tw. or (Follow up adj (study or studies)).tw. or (observational adj (study or studies)).tw. or Longitudinal.tw. or Retrospective.tw. or Cross sectional.tw. or Cross-sectional studies/                                                                                                                                                                                                                                                                                                                                                                   |
| 13 | 11 OR 12                                                                                                                                                                                                                                                                                                                                                                                                                                                                                                                                                                                                                                                                                                          |
| 14 | 10 AND 13                                                                                                                                                                                                                                                                                                                                                                                                                                                                                                                                                                                                                                                                                                         |
| 15 | animals/ not (human/ and animals/)                                                                                                                                                                                                                                                                                                                                                                                                                                                                                                                                                                                                                                                                                |
| 16 | 14 NOT 15                                                                                                                                                                                                                                                                                                                                                                                                                                                                                                                                                                                                                                                                                                         |
| 17 | limit 16 to yr="2010 -Current"                                                                                                                                                                                                                                                                                                                                                                                                                                                                                                                                                                                                                                                                                    |

## 1-2. OVID-Embase

| No. | Keywords                                              |
|-----|-------------------------------------------------------|
| 1   | exp Chronic Hepatitis C/                              |
| 2   | chronic adj5 (hepatitis C or hepacivirus* or hcv).mp. |
| 3   | 1 OR 2                                                |
| 4   | exp Antivirus agent/                                  |
| 5   | exp Proteinase Inhibitor/                             |

|    |                                                                                                                                                                                                                                                                                                                                                                                                                                                                                                                                                                                                                                                                   |
|----|-------------------------------------------------------------------------------------------------------------------------------------------------------------------------------------------------------------------------------------------------------------------------------------------------------------------------------------------------------------------------------------------------------------------------------------------------------------------------------------------------------------------------------------------------------------------------------------------------------------------------------------------------------------------|
| 6  | exp Nucleic acid synthesis inhibitor/                                                                                                                                                                                                                                                                                                                                                                                                                                                                                                                                                                                                                             |
| 7  | (direct* acting anti?viral*) or DAA or ((protease or polymerase) adj3 inhibitor*).mp.                                                                                                                                                                                                                                                                                                                                                                                                                                                                                                                                                                             |
| 8  | (ledipasvir OR sofosbuvir OR elbasvir OR grazoprevir OR velpatasvir OR voxilaprevir OR glecaprevir OR pibrentasvir OR ombitasvir OR paritaprevir OR ritonavir OR dasabuvir OR simeprevir OR boceprevir OR telaprevir OR asunaprevir OR daclatasvir OR Harvoni OR Zepatier OR Epclusa OR Vosevi OR Mavyret OR Maviret OR "Holkira Pak" OR "Viekira Pak" OR Viekirax OR Exviera OR Technivie OR Galexos OR Sovaldi OR Victrelis OR Incivek OR Incivo OR Olysio OR Sunvepra OR Daklinza).mp.                                                                                                                                                                         |
| 9  | 4 or 5 or 6 or 7 or 8                                                                                                                                                                                                                                                                                                                                                                                                                                                                                                                                                                                                                                             |
| 10 | 3 and 9                                                                                                                                                                                                                                                                                                                                                                                                                                                                                                                                                                                                                                                           |
| 11 | (Clinical Trial/ OR Randomized Controlled Trial/ OR controlled clinical trial/ OR multicenter study/ OR Phase 3 clinical trial/ OR Phase 4 clinical trial/ OR exp RANDOMIZATION/ OR Single Blind Procedure/ OR Double Blind Procedure/ OR Crossover Procedure/ OR PLACEBO/ OR randomi?ed controlled trial\$.tw. OR rct.tw.<br>OR (random\$ adj2 allocat\$).tw. OR single blind\$.tw. OR double blind\$.tw. OR ((treble or triple) adj blind\$).tw. OR placebo\$.tw. OR Prospective Study/) not (Case Study/ OR case report.tw. OR abstract report/ or letter/ OR Conference proceeding.pt. OR Conference abstract.pt. OR Editorial.pt. OR Letter.pt. OR Note.pt.) |
| 12 | Clinical study/ OR Case control study OR Family study/ OR Longitudinal study/ OR Retrospective study OR (Prospective study/ not Randomized controlled trials/) OR Cohort analysis/ OR (Cohort adj (study or studies)).mp. OR (Case control adj (study or studies)).tw. OR (follow up adj (study or studies)).tw. OR (observational adj (study or studies)).tw. OR (epidemiologic\$ adj (study or studies)).tw. OR (cross sectional adj (study or studies)).tw.                                                                                                                                                                                                    |
| 13 | 11 OR 12                                                                                                                                                                                                                                                                                                                                                                                                                                                                                                                                                                                                                                                          |
| 14 | 10 AND 13                                                                                                                                                                                                                                                                                                                                                                                                                                                                                                                                                                                                                                                         |
| 15 | animals/ not (human/ and animals/)                                                                                                                                                                                                                                                                                                                                                                                                                                                                                                                                                                                                                                |
| 16 | 14 NOT 15                                                                                                                                                                                                                                                                                                                                                                                                                                                                                                                                                                                                                                                         |
| 17 | limit 16 to yr="2010 -Current"                                                                                                                                                                                                                                                                                                                                                                                                                                                                                                                                                                                                                                    |

### 1-3. Cochrane Register of Controlled Trials (CENTRAL)

| No. | Keywords                                                                                                                                                                                                                                                                                                                                                                                                                                                                              |
|-----|---------------------------------------------------------------------------------------------------------------------------------------------------------------------------------------------------------------------------------------------------------------------------------------------------------------------------------------------------------------------------------------------------------------------------------------------------------------------------------------|
| 1   | [Hepatitis C, Chronic] explode all trees                                                                                                                                                                                                                                                                                                                                                                                                                                              |
| 2   | chronic near/5 (hepatitis C or hepacivirus* or hcv)                                                                                                                                                                                                                                                                                                                                                                                                                                   |
| 3   | #1 OR #2                                                                                                                                                                                                                                                                                                                                                                                                                                                                              |
| 4   | MeSH descriptor: [Antiviral Agents] explode all trees                                                                                                                                                                                                                                                                                                                                                                                                                                 |
| 5   | MeSH descriptor: [Protease Inhibitors] explode all trees                                                                                                                                                                                                                                                                                                                                                                                                                              |
| 6   | MeSH descriptor: [Nucleic Acid Synthesis Inhibitors] explode all trees                                                                                                                                                                                                                                                                                                                                                                                                                |
| 7   | (direct* acting anti?viral*) or DAA or ((protease or polymerase) near/3 inhibitor*)                                                                                                                                                                                                                                                                                                                                                                                                   |
| 8   | (ledipasvir OR sofosbuvir OR elbasvir OR grazoprevir OR velpatasvir OR voxilaprevir OR glecaprevir OR pibrentasvir OR ombitasvir OR paritaprevir OR ritonavir OR dasabuvir OR simeprevir OR boceprevir OR telaprevir OR asunaprevir OR daclatasvir OR Harvoni OR Zepatier OR Epclusa OR Vosevi OR Mavyret OR Maviret OR 'Holkira Pak' OR 'Viekira Pak' OR Viekirax OR Exviera OR Technivie OR Galexos OR Sovaldi OR Victrelis OR Incivek OR Incivo OR Olysio OR Sunvepra OR Daklinza) |
| 9   | #4 or #5 or #6 or #7 or #8                                                                                                                                                                                                                                                                                                                                                                                                                                                            |
| 10  | #3 and #9                                                                                                                                                                                                                                                                                                                                                                                                                                                                             |
| 11  | #10 with Publication Year from 2010 to 2020, in Trials                                                                                                                                                                                                                                                                                                                                                                                                                                |

### 1-4 Local databases

| Local Database | Search strategy                                                                                                                                                                                                                                                                                                                                                                                                                                                                                                                                                                                                            |
|----------------|----------------------------------------------------------------------------------------------------------------------------------------------------------------------------------------------------------------------------------------------------------------------------------------------------------------------------------------------------------------------------------------------------------------------------------------------------------------------------------------------------------------------------------------------------------------------------------------------------------------------------|
| Kmbase         | <p>("hepatitis C" OR hepacivirus OR HCV) AND ("direct acting antiviral" OR DAA)</p> <p>("hepatitis C" OR hepacivirus OR HCV) AND (ledipasvir OR sofosbuvir OR elbasvir OR grazoprevir OR velpatasvir OR voxilaprevir OR glecaprevir OR pibrentasvir OR ombitasvir OR paritaprevir OR ritonavir OR dasabuvir OR simeprevir OR boceprevir OR telaprevir OR asunaprevir OR daclatasvir OR Harvoni OR Zepatier OR Epclusa OR Vosevi OR Mavyret OR Maviret OR "Holkira Pak" OR "Viekira Pak" OR Viekirax OR Exviera OR Technivie OR Galexos OR Sovaldi OR Victrelis OR Incivek OR Incivo OR Olysio OR Sunvepra OR Daklinza)</p> |

|        |                                                                                                                                                                                                                                                                                                                                                                                                                                                                                       |
|--------|---------------------------------------------------------------------------------------------------------------------------------------------------------------------------------------------------------------------------------------------------------------------------------------------------------------------------------------------------------------------------------------------------------------------------------------------------------------------------------------|
| Kmbase | Overall results after excluding duplicates                                                                                                                                                                                                                                                                                                                                                                                                                                            |
|        | ("hepatitis C" OR hepacivirus OR HCV) AND "direct acting antiviral"                                                                                                                                                                                                                                                                                                                                                                                                                   |
|        | ("hepatitis C" OR hepacivirus OR HCV) AND DAA                                                                                                                                                                                                                                                                                                                                                                                                                                         |
|        | (ledipasvir OR sofosbuvir OR elbasvir OR grazoprevir OR velpatasvir OR voxilaprevir OR glecaprevir OR pibrentasvir OR ombitasvir OR paritaprevir OR ritonavir OR dasabuvir OR simeprevir OR boceprevir OR telaprevir OR asunaprevir OR daclatasvir OR Harvoni OR Zepatier OR Epclusa OR Vosevi OR Mavyret OR Maviret OR "Holkira Pak" OR "Viekira Pak" OR Viekirax OR Exviera OR Technivie OR Galexos OR Sovaldi OR Victrelis OR Incivek OR Incivo OR Olysio OR Sunvepra OR Daklinza) |
|        | (([ALL=C형 간염] OR [ALL=C형 간염]) AND ([ALL=항바이러스제] OR [ALL=항 바이러스제]))                                                                                                                                                                                                                                                                                                                                                                                                                    |
|        | Overall results after excluding duplicates                                                                                                                                                                                                                                                                                                                                                                                                                                            |
| RISS   | ("hepatitis C" OR hepacivirus OR HCV) AND "direct acting antiviral"                                                                                                                                                                                                                                                                                                                                                                                                                   |
|        | ("hepatitis C" OR hepacivirus OR HCV) AND DAA                                                                                                                                                                                                                                                                                                                                                                                                                                         |
|        | (ledipasvir OR sofosbuvir OR elbasvir OR grazoprevir OR velpatasvir OR voxilaprevir OR glecaprevir OR pibrentasvir OR ombitasvir OR paritaprevir OR ritonavir OR dasabuvir OR simeprevir OR boceprevir OR telaprevir OR asunaprevir OR daclatasvir OR Harvoni OR Zepatier OR Epclusa OR Vosevi OR Mavyret OR Maviret OR "Holkira Pak" OR "Viekira Pak" OR Viekirax OR Exviera OR Technivie OR Galexos OR Sovaldi OR Victrelis OR Incivek OR Incivo OR Olysio OR Sunvepra OR Daklinza) |
|        | C형 간염 AND 항 바이러스제                                                                                                                                                                                                                                                                                                                                                                                                                                                                     |
|        | C형 간염 AND 항바이러스제                                                                                                                                                                                                                                                                                                                                                                                                                                                                      |
|        | Overall results after excluding duplicates                                                                                                                                                                                                                                                                                                                                                                                                                                            |

## II. Supplementary figures

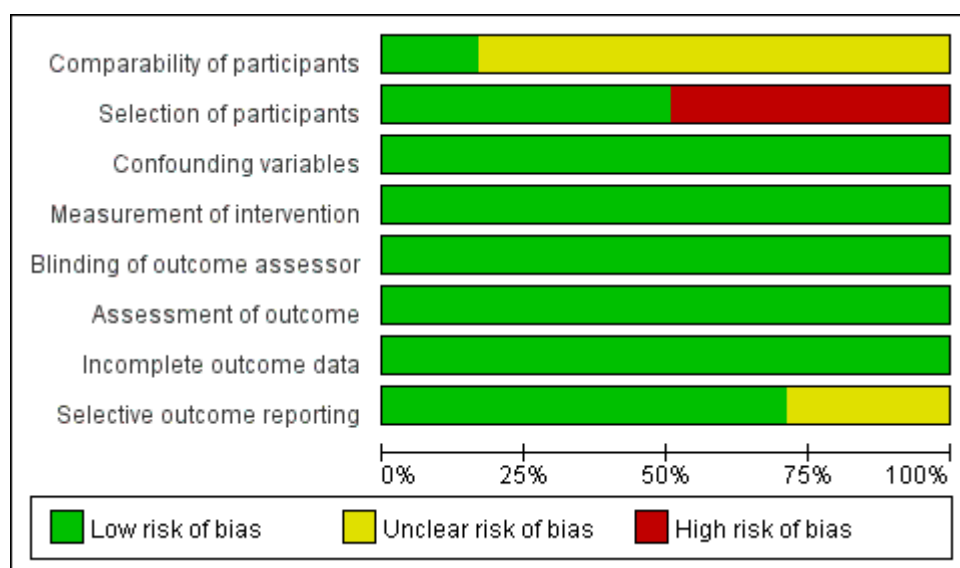

|                        | Comparability of participants | Selection of participants | Confounding variables | Measurement of intervention | Blinding of outcome assessor | Assessment of outcome | Incomplete outcome data | Selective outcome reporting |
|------------------------|-------------------------------|---------------------------|-----------------------|-----------------------------|------------------------------|-----------------------|-------------------------|-----------------------------|
| Atahal 2017            | ?                             | ?                         | ?                     | ?                           | ?                            | ?                     | ?                       | ?                           |
| Alonso 2017            | ?                             | ?                         | ?                     | ?                           | ?                            | ?                     | ?                       | ?                           |
| Backus 2016            | ?                             | ?                         | ?                     | ?                           | ?                            | ?                     | ?                       | ?                           |
| Belli 2016             | ?                             | ?                         | ?                     | ?                           | ?                            | ?                     | ?                       | ?                           |
| Belli 2018             | ?                             | ?                         | ?                     | ?                           | ?                            | ?                     | ?                       | ?                           |
| Berkan- Kawiriska 2021 | ?                             | ?                         | ?                     | ?                           | ?                            | ?                     | ?                       | ?                           |
| Bittermann 2021        | ?                             | ?                         | ?                     | ?                           | ?                            | ?                     | ?                       | ?                           |
| Calleja, 2017          | ?                             | ?                         | ?                     | ?                           | ?                            | ?                     | ?                       | ?                           |
| Calvaruso 2018         | ?                             | ?                         | ?                     | ?                           | ?                            | ?                     | ?                       | ?                           |
| Carrillo 2017          | ?                             | ?                         | ?                     | ?                           | ?                            | ?                     | ?                       | ?                           |
| Charlton 2015          | ?                             | ?                         | ?                     | ?                           | ?                            | ?                     | ?                       | ?                           |
| Chatterjee 2019        | ?                             | ?                         | ?                     | ?                           | ?                            | ?                     | ?                       | ?                           |
| Cheung 2016            | ?                             | ?                         | ?                     | ?                           | ?                            | ?                     | ?                       | ?                           |
| Curry 2015             | ?                             | ?                         | ?                     | ?                           | ?                            | ?                     | ?                       | ?                           |
| Curry 2016             | ?                             | ?                         | ?                     | ?                           | ?                            | ?                     | ?                       | ?                           |
| Debnath 2019           | ?                             | ?                         | ?                     | ?                           | ?                            | ?                     | ?                       | ?                           |
| Deterding 2015         | ?                             | ?                         | ?                     | ?                           | ?                            | ?                     | ?                       | ?                           |
| Essa 2019              | ?                             | ?                         | ?                     | ?                           | ?                            | ?                     | ?                       | ?                           |
| Flemming 2017          | ?                             | ?                         | ?                     | ?                           | ?                            | ?                     | ?                       | ?                           |
| Foster 2016            | ?                             | ?                         | ?                     | ?                           | ?                            | ?                     | ?                       | ?                           |
| Garg 2018              | ?                             | ?                         | ?                     | ?                           | ?                            | ?                     | ?                       | ?                           |
| Gentile 2019           | ?                             | ?                         | ?                     | ?                           | ?                            | ?                     | ?                       | ?                           |
| Goel 2017              | ?                             | ?                         | ?                     | ?                           | ?                            | ?                     | ?                       | ?                           |
| Gupta 2018             | ?                             | ?                         | ?                     | ?                           | ?                            | ?                     | ?                       | ?                           |
| Hanafy 2019            | ?                             | ?                         | ?                     | ?                           | ?                            | ?                     | ?                       | ?                           |
| Ibrahim 2021           | ?                             | ?                         | ?                     | ?                           | ?                            | ?                     | ?                       | ?                           |
| Jacobson 2019          | ?                             | ?                         | ?                     | ?                           | ?                            | ?                     | ?                       | ?                           |
| Krassenburg 2020       | ?                             | ?                         | ?                     | ?                           | ?                            | ?                     | ?                       | ?                           |
| Kumada 2021            | ?                             | ?                         | ?                     | ?                           | ?                            | ?                     | ?                       | ?                           |
| Kwo 2018               | ?                             | ?                         | ?                     | ?                           | ?                            | ?                     | ?                       | ?                           |
| Lens 2017              | ?                             | ?                         | ?                     | ?                           | ?                            | ?                     | ?                       | ?                           |
| Lens 2020              | ?                             | ?                         | ?                     | ?                           | ?                            | ?                     | ?                       | ?                           |
| Lim 2018               | ?                             | ?                         | ?                     | ?                           | ?                            | ?                     | ?                       | ?                           |
| Lobato 2019            | ?                             | ?                         | ?                     | ?                           | ?                            | ?                     | ?                       | ?                           |
| Lourenco 2021          | ?                             | ?                         | ?                     | ?                           | ?                            | ?                     | ?                       | ?                           |
| Maan 2016              | ?                             | ?                         | ?                     | ?                           | ?                            | ?                     | ?                       | ?                           |
| Macken 2019            | ?                             | ?                         | ?                     | ?                           | ?                            | ?                     | ?                       | ?                           |
| Mandorfer 2016         | ?                             | ?                         | ?                     | ?                           | ?                            | ?                     | ?                       | ?                           |
| Mangia 2018            | ?                             | ?                         | ?                     | ?                           | ?                            | ?                     | ?                       | ?                           |
| Manolopoulos 2017      | ?                             | ?                         | ?                     | ?                           | ?                            | ?                     | ?                       | ?                           |
| Mazzarelli 2018        | ?                             | ?                         | ?                     | ?                           | ?                            | ?                     | ?                       | ?                           |
| McCaughan 2017         | ?                             | ?                         | ?                     | ?                           | ?                            | ?                     | ?                       | ?                           |
| Modi 2016              | ?                             | ?                         | ?                     | ?                           | ?                            | ?                     | ?                       | ?                           |
| Ormar El-Sherif 2018   | ?                             | ?                         | ?                     | ?                           | ?                            | ?                     | ?                       | ?                           |
| Papatheodoridis 2017   | ?                             | ?                         | ?                     | ?                           | ?                            | ?                     | ?                       | ?                           |
| Pascasio 2017          | ?                             | ?                         | ?                     | ?                           | ?                            | ?                     | ?                       | ?                           |
| Poordad 2016           | ?                             | ?                         | ?                     | ?                           | ?                            | ?                     | ?                       | ?                           |
| Ridruejo 2019          | ?                             | ?                         | ?                     | ?                           | ?                            | ?                     | ?                       | ?                           |
| Sanai 2018             | ?                             | ?                         | ?                     | ?                           | ?                            | ?                     | ?                       | ?                           |
| Sandmann 2018          | ?                             | ?                         | ?                     | ?                           | ?                            | ?                     | ?                       | ?                           |
| Saxena 2015            | ?                             | ?                         | ?                     | ?                           | ?                            | ?                     | ?                       | ?                           |
| Shiffman 2015          | ?                             | ?                         | ?                     | ?                           | ?                            | ?                     | ?                       | ?                           |
| Steinebrunner 2018     | ?                             | ?                         | ?                     | ?                           | ?                            | ?                     | ?                       | ?                           |
| Tahata 2021            | ?                             | ?                         | ?                     | ?                           | ?                            | ?                     | ?                       | ?                           |
| Terrault 2016          | ?                             | ?                         | ?                     | ?                           | ?                            | ?                     | ?                       | ?                           |
| Tmu 2019               | ?                             | ?                         | ?                     | ?                           | ?                            | ?                     | ?                       | ?                           |
| Verna 2020             | ?                             | ?                         | ?                     | ?                           | ?                            | ?                     | ?                       | ?                           |
| Wei 2020               | ?                             | ?                         | ?                     | ?                           | ?                            | ?                     | ?                       | ?                           |
| Weitzel 2016           | ?                             | ?                         | ?                     | ?                           | ?                            | ?                     | ?                       | ?                           |

Supplementary Figure S1. Risk of bias.

(A)

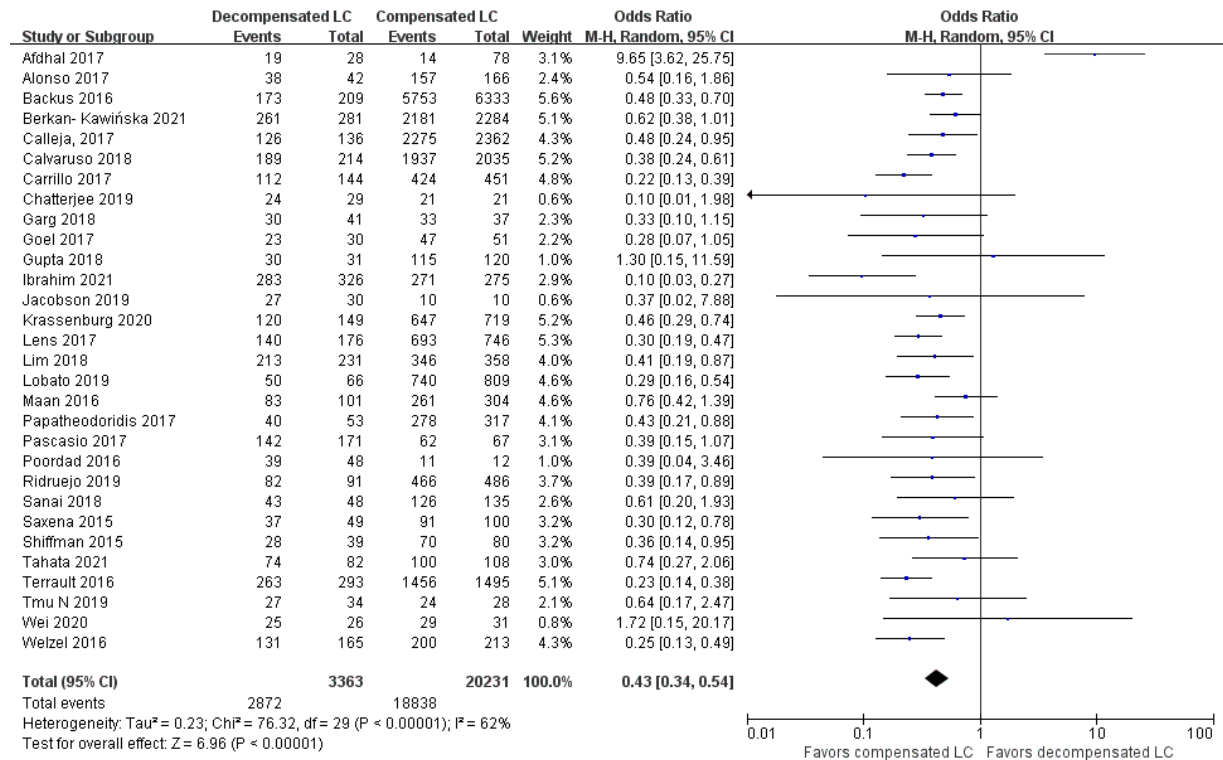

(B)

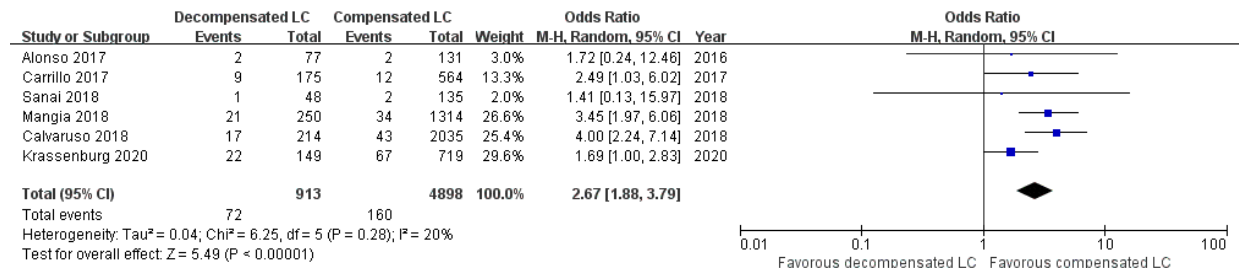

(C)

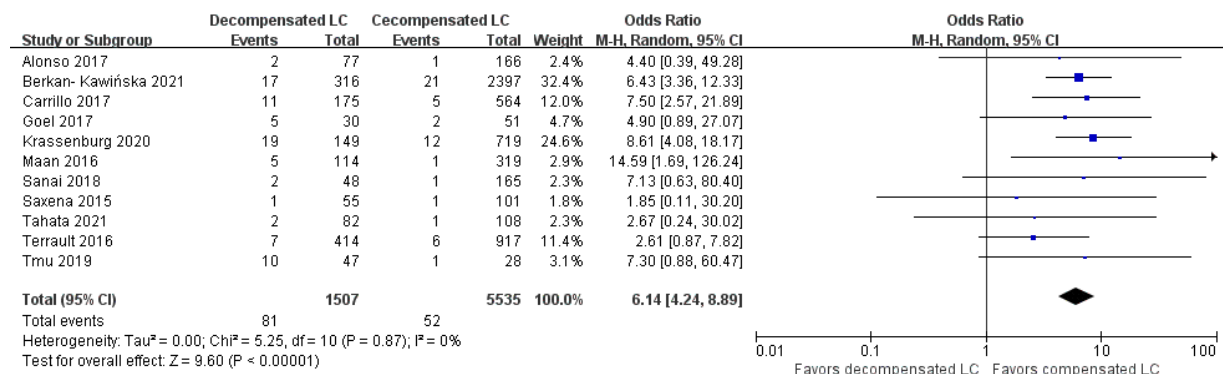

Supplementary Figure S2. Estimated event rate of (A) sustained virologic response of



direct-acting antiviral (DAAs), (B) development of hepatocellular carcinoma, and (C) mortality in decompensated vs. compensated liver cirrhosis patients with chronic hepatitis C virus (HCV) infection. CI, confidence interval.

(A)

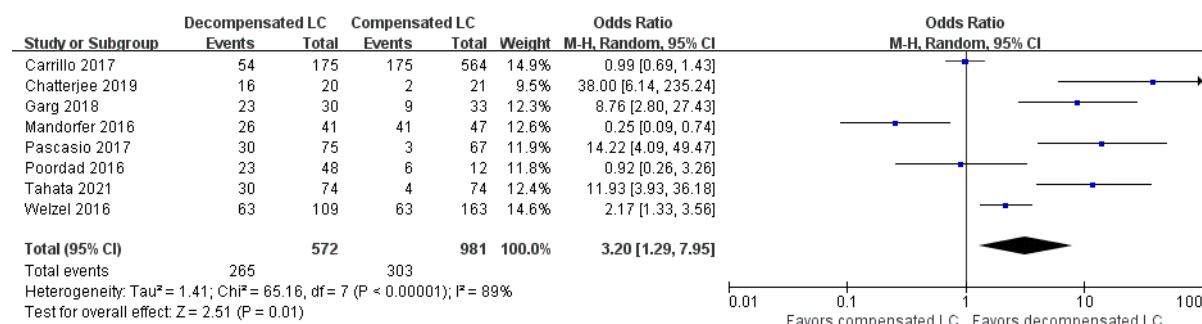

(B)

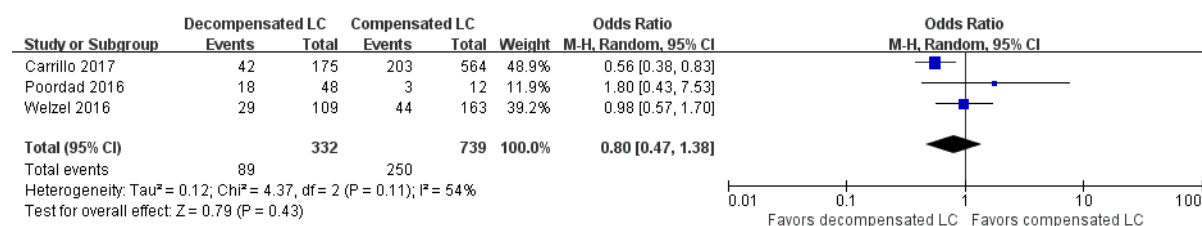

Supplementary Figure S3. Estimated event rate of (A) improvement in liver function and (B) worsening in liver function after direct-acting antiviral (DAA) treatment in decompensated vs. compensated liver cirrhosis patients.
